# Supplementary material for: Identification of Biomarker for Cutaneous Squamous Cell Carcinoma Using Microarray Data Analysis
Source: PubMed Central journal article supplement — J Cancer. 2018 Jan 1;9(2):400–6. doi: 10.7150/jca.21381 (PMC5771347; doi:10.7150/jca.21381), 2018-01-01
Supplement: jcav09p0400s1.pdf [file jcav09p0400s1.pdf]

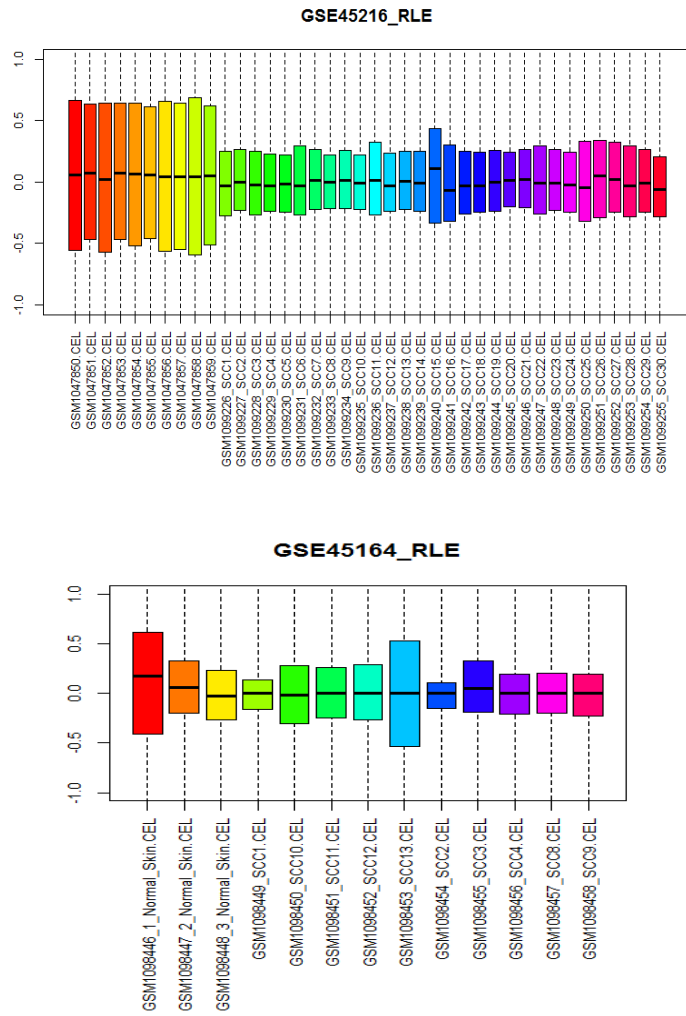

**Supplementary figure1.** Relative logarithmic expression box figure. GSE45216\_RLE and GSE45164\_RLE represented the relative logarithmic box plot of GSE7670 and GSE10072 datasets, respectively.

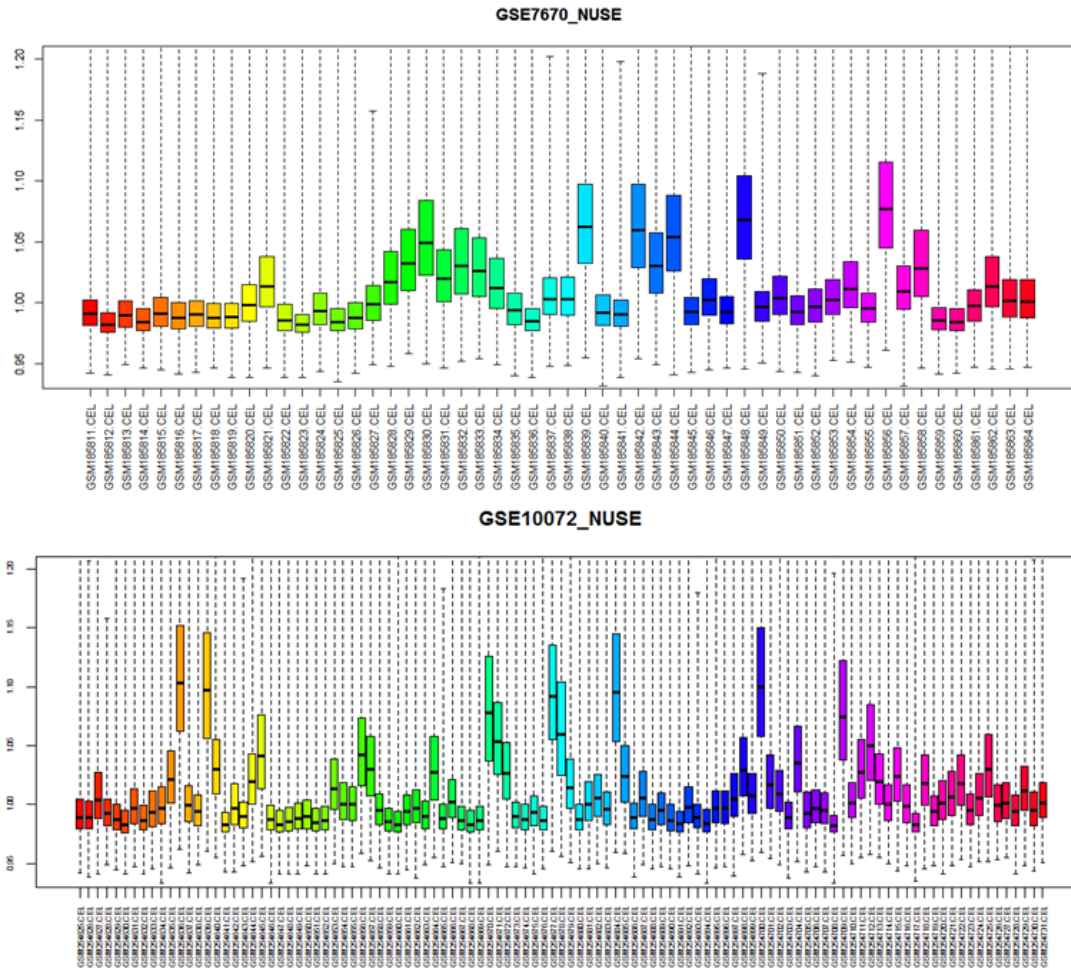

**Supplementary figure2.** Box plot of relative standardization. GSE7670\_NUSE and GSE10072\_NUSE represented the standard deviation box plot of GSE7670 and GSE10072 datasets, respectively.
